# Supplementary material for: Population-based study of effectiveness of neoadjuvant radiotherapy on survival in US rectal cancer patients according to age
Source: PubMed Central journal article supplement (PMC5471198; doi:10.1038/s41598-017-02992-7), 2017-06-14
Supplement: 41598_2017_2992_MOESM1_ESM.pdf [file 41598_2017_2992_MOESM1_ESM.pdf]

# Population-based study of effectiveness of neoadjuvant radiotherapy on survival in US rectal cancer patients according to age

Leilei Wu<sup>1</sup>, Shichao Pang<sup>4</sup>, Qianlan Yao<sup>1</sup>, Chen Jian<sup>5</sup>, Ping Lin<sup>2</sup>, Fangyoumin Feng<sup>2,6</sup>, Hong Li<sup>2,\*</sup>, Yixue Li<sup>1,2,3,\*</sup>

<sup>1</sup> School of Life Sciences and Biotechnology, Shanghai Jiao Tong University, Shanghai, 200240, China;

<sup>2</sup> CAS Key Laboratory for Computational Biology, CAS-MPG Partner Institute for Computational Biology, Shanghai Institute for Biological Sciences, Chinese Academy of Sciences, Shanghai, 200031, China;

<sup>3</sup> Collaborative Innovation Center of Genetics and Development, Fudan University, Shanghai, 200433, China;

<sup>4</sup> Department of Statistics, School of Mathematical Sciences, Shanghai Jiao Tong University, Shanghai, 200240, China;

<sup>5</sup> Department of General Surgery, Shanghai General Hospital, Shanghai Jiao Tong University School of Medicine, Songjiang district, 201600, Shanghai;

<sup>6</sup> School of Life Science and Technology, ShanghaiTech University, Shanghai 201210, China;

\* To whom correspondence should be addressed. Tel: 86-21-54920079; Fax: 86-21-54920079; Email: yxli@sibs.ac.cn.

Correspondence may also be addressed to Hong Li. Tel: 86-21-54920079; Fax: 86-21-54920079; Email: lihong01@sibs.ac.cn

## **SUPPLEMENTARY TABLE, FIGURE LEGENDS AND ABERRATION**

**Supplementary Table S1:** HR and 95% CI of neoadjuvant radiation in subgroups of significant covariates.

**Supplementary Table S2:** Comparison of clinical characteristics between patients with or without neoadjuvant radiotherapy in younger.

**Supplementary Table S3:** Clinic pathological items of rectum cancer patients according to age groups.

**Supplementary Table S4:** Multivariate survival analysis of prognostic factors in stage II and III patients, respectively.

**Supplementary Figure 1:** Distribution and incidence of rectal cancer by age. A): Distribution in different age interval in our propensity score matched cohort. B): Percentage of rectal cancer patients in younger ( $\leq 50$ ) and older groups ( $> 50$ ). C): Trend of incidence rates (per 100,000) of rectal cancer in younger group (read solid line) and older groups (blue dotted line) from 1992 to 2012.

**Supplementary Figure 2:** Disease-specific Survival curves of neoadjuvant radiation in all significant covariates group. A1~A4: 5 year disease specific survival curves between neoadjuvant radiation and control in four different grade groups(A1:well;A2:moderately;A3:Poorly;A4: undifferentiated). B1~B2: 5 year disease specific survival curves between neoadjuvant radiation and control in different lymph node resected groups(B1: $> 12$ ;B2: $\leq 12$ ). C1~C2: 5 year disease specific survival curves between neoadjuvant radiation and control in different histological type groups(C1:Mucinous;C2: Non-mucinous). D1~D2: 5 year disease specific survival curves between neoadjuvant radiation and control in different tumor size groups (D1: $> 5$ ;C2: $\leq 5$ ). 5 year disease specific survival curves between neoadjuvant radiation and control in different age groups((E1: $\leq 50$ ;E2: $> 50$ )).

**Supplementary Figure 3:** Cancer-specific Survival curves of neoadjuvant radiation for short-term( $\leq 3$ , ST) and long term( $> 3$ , LT) group in younger and older patients. A) Cancer-specific survival for ST in younger patients. B) Cancer-specific survival for ST in older patients. C) Cancer-specific survival for LT in younger patients. D) Cancer-specific survival for LT in older patients. All figures also report HR of neoadjuvant radiation in different situation.

### **Aberration**

|      |                                            |
|------|--------------------------------------------|
| SEER | Surveillance, Epidemiology, and End Result |
| MSI  | MicroSatellite Instability                 |
| CRC  | ColoRectal Cancer                          |
| S.D  | Standardized Difference                    |

|      |                              |
|------|------------------------------|
| CSS  | Cancer-Specific Survival     |
| RCTs | Randomized Controlled Trials |
| TME  | Total Mesorectal Excision    |
| HR   | Hazard Ratio                 |
| RR   | Risk Ratio                   |

A

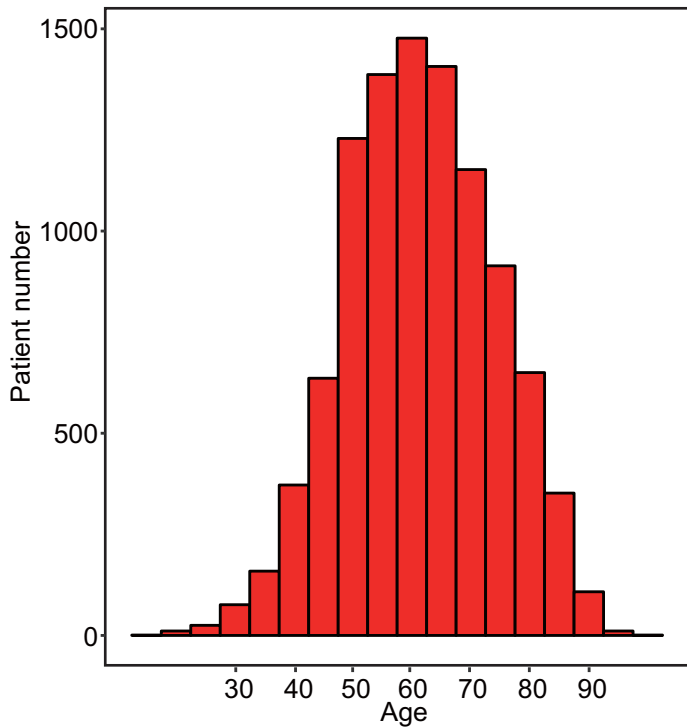

B

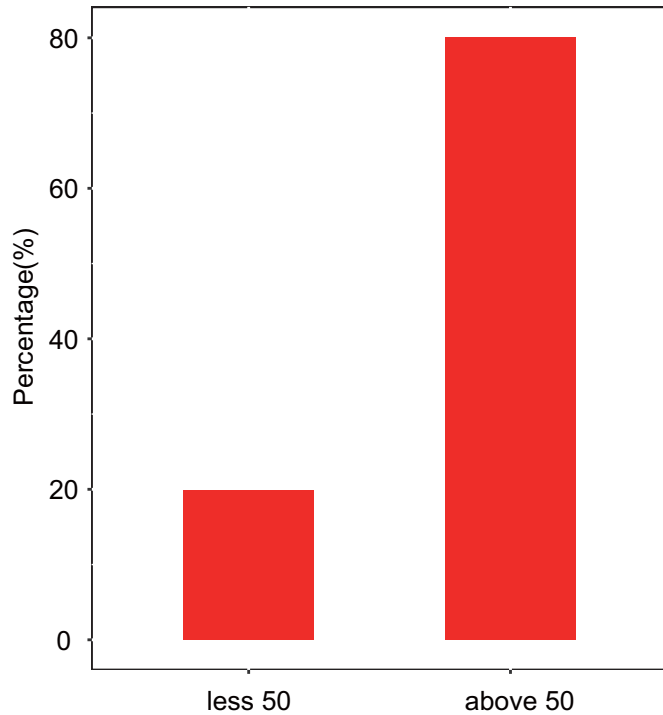

C

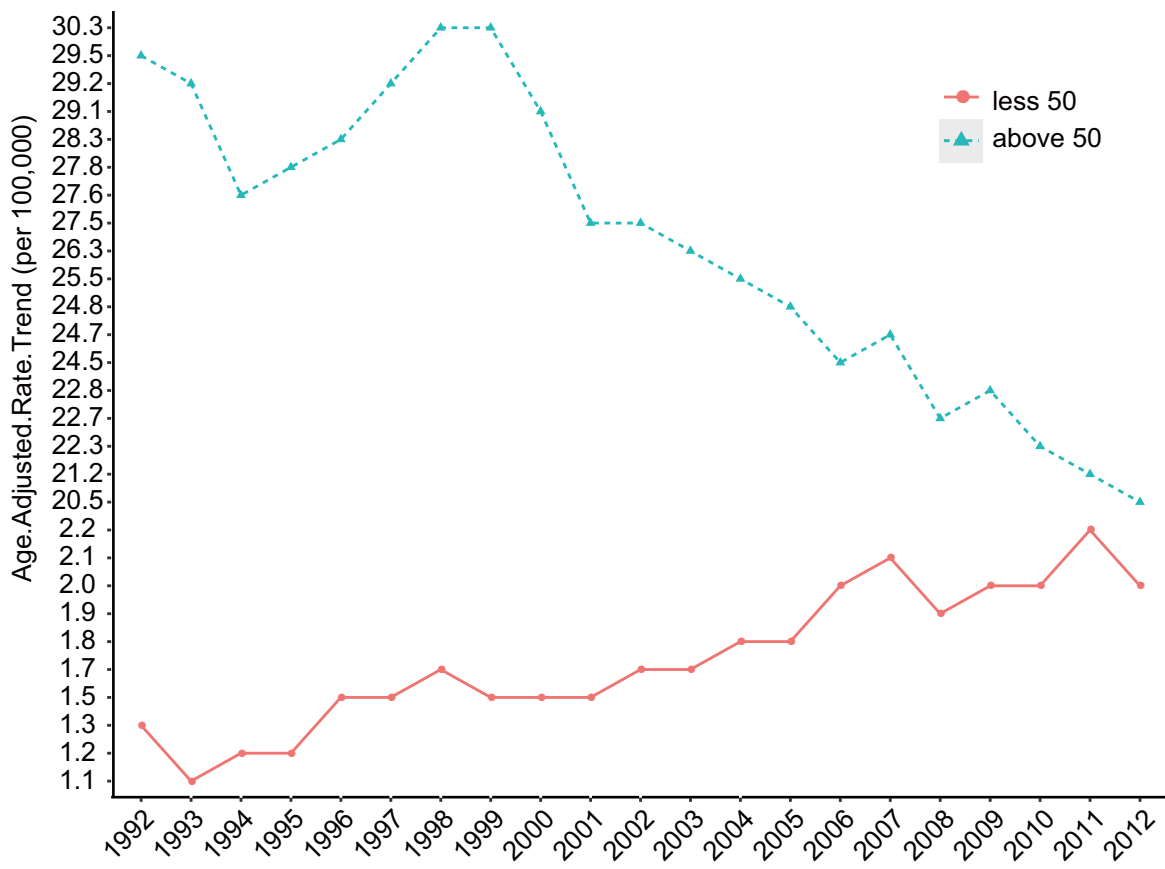

A1 Grade: Well

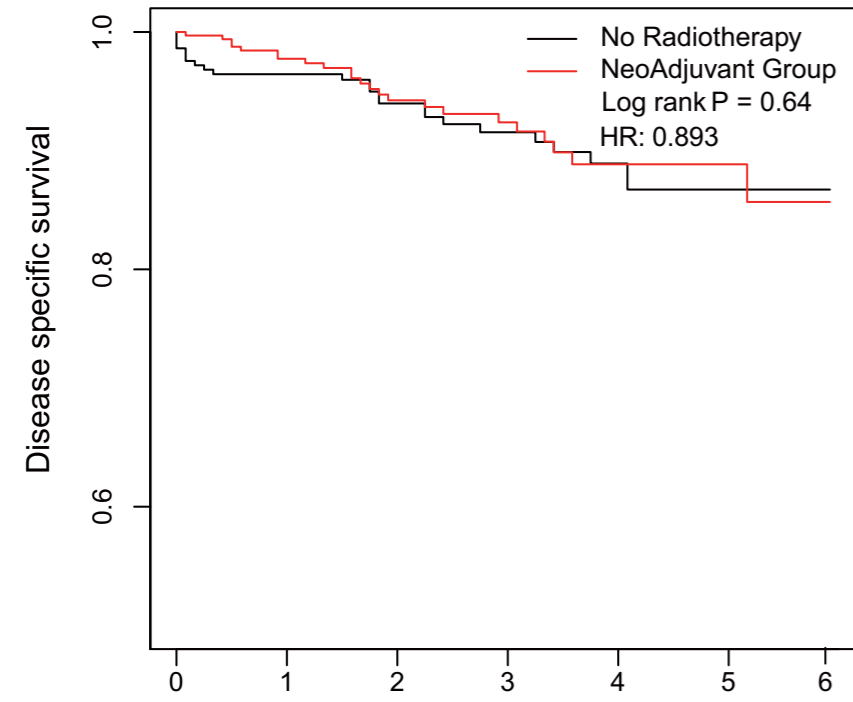

|                   |     |     |     |     |    |    |
|-------------------|-----|-----|-----|-----|----|----|
| No. at risk       |     |     |     |     |    |    |
| No Radiotherapy   | 291 | 226 | 176 | 121 | 87 | 37 |
| NeoAdjuvant Group | 340 | 276 | 182 | 127 | 72 | 36 |

A2 Grade: Moderately

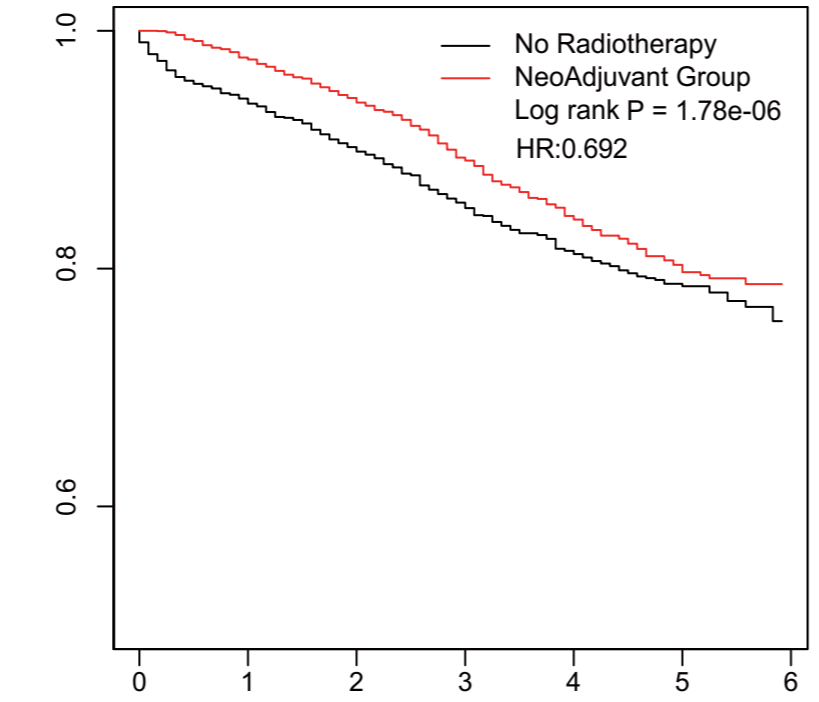

|                   |      |      |      |      |     |     |
|-------------------|------|------|------|------|-----|-----|
| No. at risk       |      |      |      |      |     |     |
| No Radiotherapy   | 3917 | 2880 | 2147 | 1475 | 895 | 382 |
| NeoAdjuvant Group | 3881 | 2959 | 2188 | 1422 | 826 | 389 |

A3 Grade: Poorly

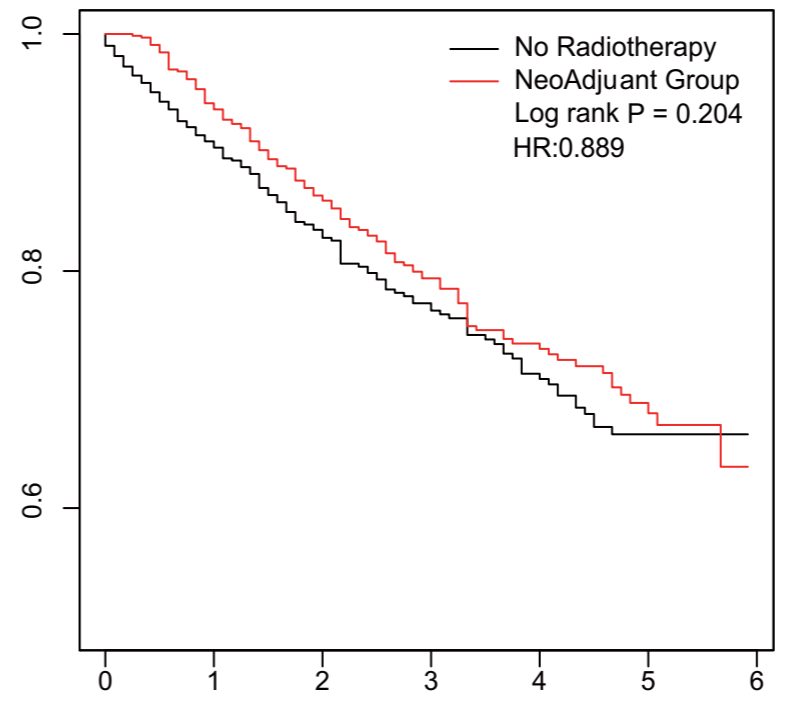

|                   |     |     |     |     |     |    |
|-------------------|-----|-----|-----|-----|-----|----|
| No. at risk       |     |     |     |     |     |    |
| No Radiotherapy   | 703 | 515 | 369 | 250 | 160 | 83 |
| NeoAdjuvant Group | 686 | 545 | 399 | 277 | 165 | 79 |

A4 Grade: Undifferentiated

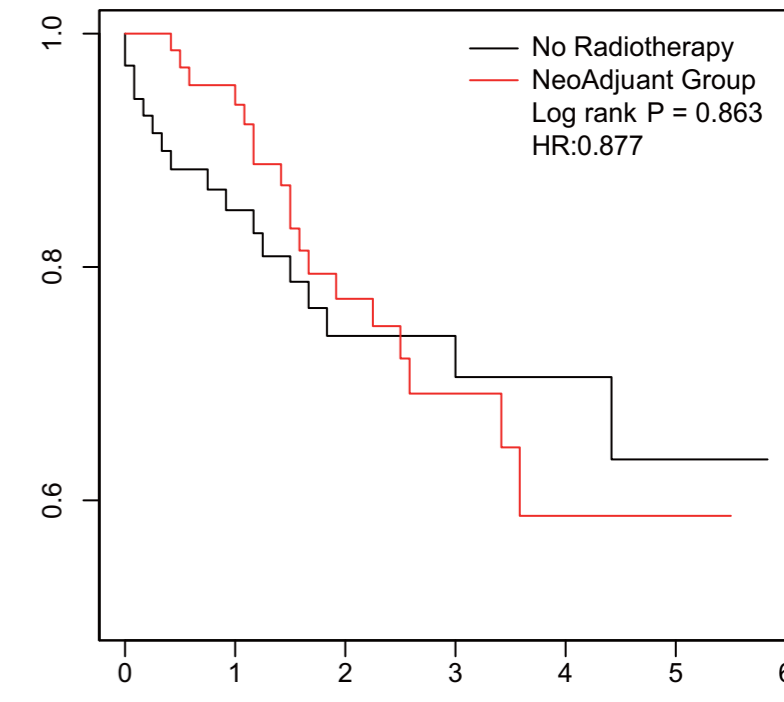

|                   |    |    |    |    |    |   |
|-------------------|----|----|----|----|----|---|
| No. at risk       |    |    |    |    |    |   |
| No Radiotherapy   | 73 | 47 | 31 | 21 | 13 | 8 |
| NeoAdjuvant Group | 77 | 57 | 35 | 18 | 8  | 2 |

B1 Lymph node resected(> 12)

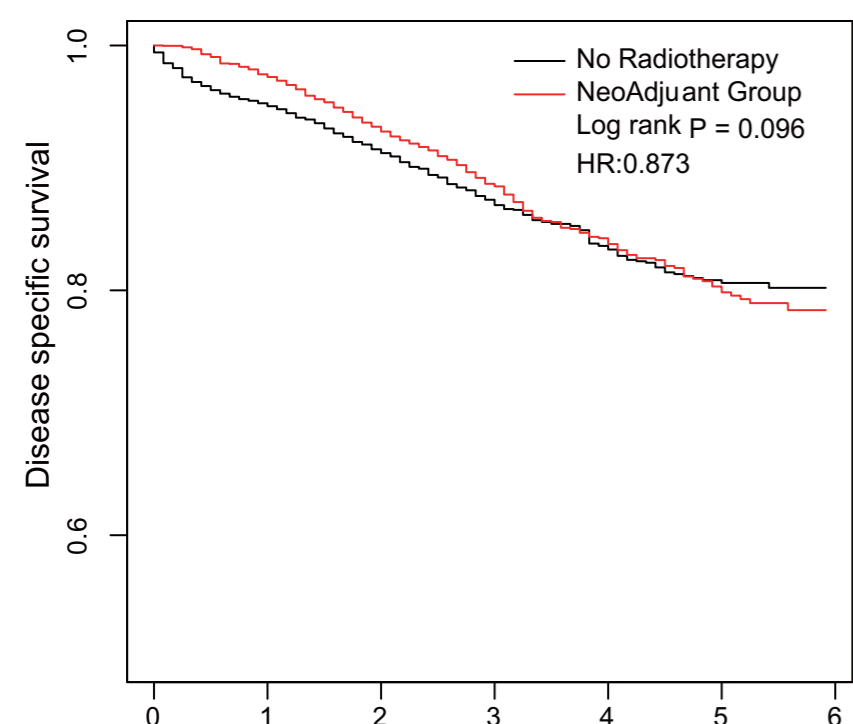

|                   |      |      |      |      |     |     |
|-------------------|------|------|------|------|-----|-----|
| No. at risk       |      |      |      |      |     |     |
| No Radiotherapy   | 3712 | 2755 | 2052 | 1394 | 847 | 356 |
| NeoAdjuvant Group | 3456 | 2630 | 1893 | 1241 | 707 | 336 |

B2 Lymph node resected(<= 12)

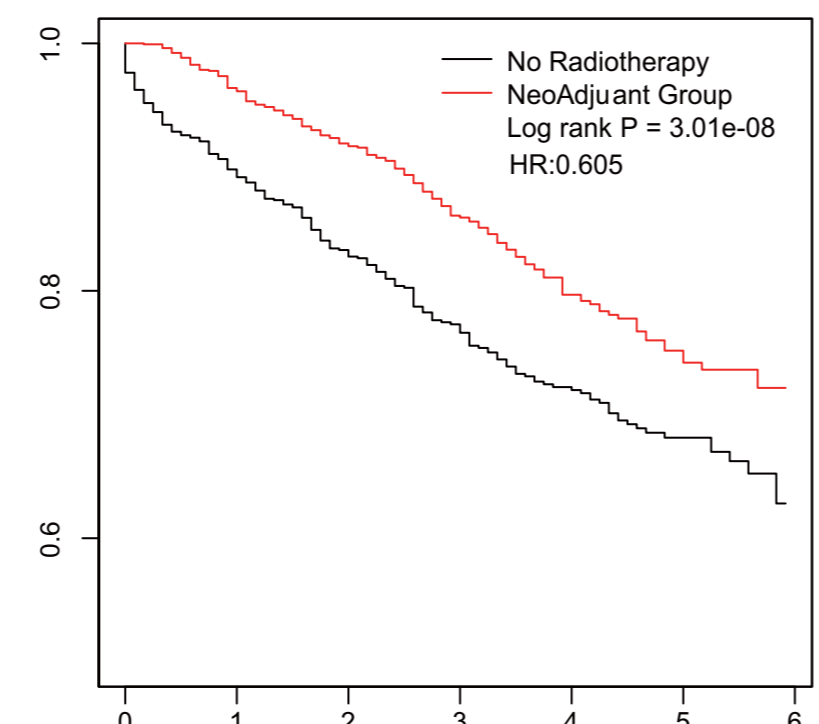

|                   |      |      |     |     |     |     |
|-------------------|------|------|-----|-----|-----|-----|
| No. at risk       |      |      |     |     |     |     |
| No Radiotherapy   | 1181 | 853  | 630 | 454 | 300 | 150 |
| NeoAdjuvant Group | 1360 | 1089 | 819 | 542 | 334 | 155 |

C1 Histological type:Mucinous

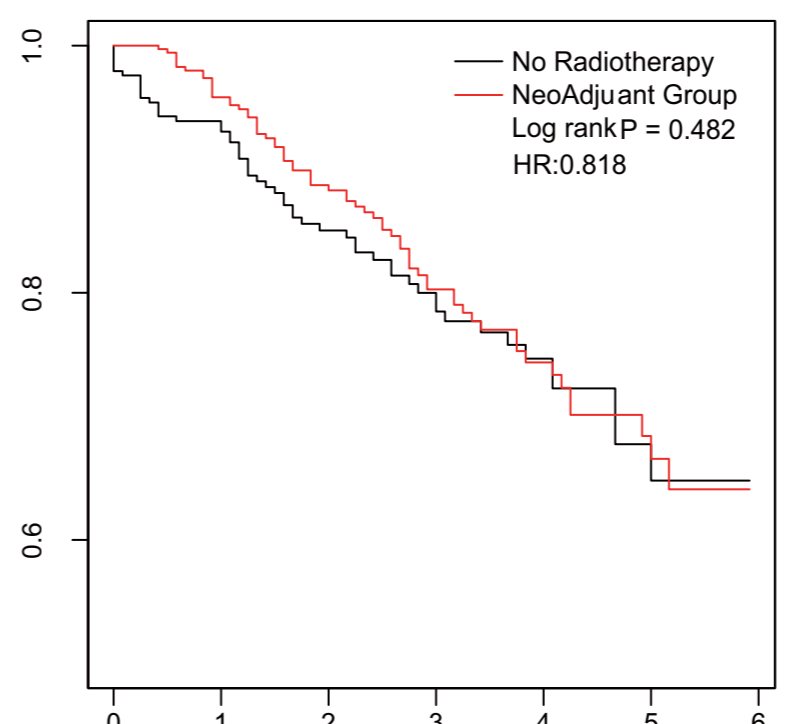

|                   |     |     |     |     |    |    |
|-------------------|-----|-----|-----|-----|----|----|
| No. at risk       |     |     |     |     |    |    |
| No Radiotherapy   | 291 | 221 | 152 | 106 | 64 | 23 |
| NeoAdjuvant Group | 373 | 302 | 210 | 133 | 75 | 37 |

C2 Histological type:Non-mucinous

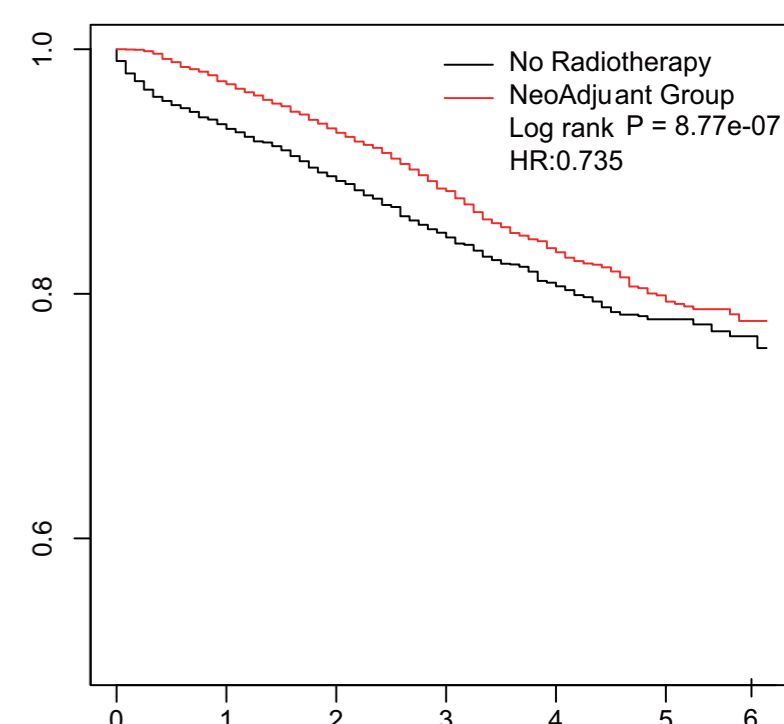

|                   |      |      |      |      |      |     |
|-------------------|------|------|------|------|------|-----|
| No. at risk       |      |      |      |      |      |     |
| No Radiotherapy   | 4658 | 3424 | 2558 | 1750 | 1086 | 486 |
| NeoAdjuvant Group | 4585 | 3514 | 2582 | 1702 | 993  | 468 |

D1 Tumor Size(> 5cm)

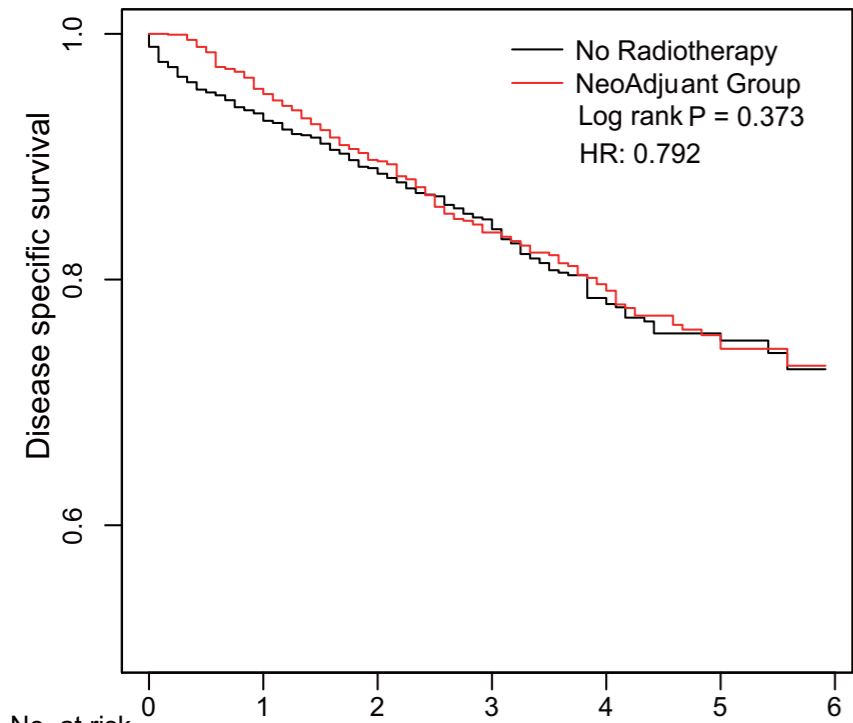

|                   |      |      |     |     |     |     |
|-------------------|------|------|-----|-----|-----|-----|
| No. at risk       |      |      |     |     |     |     |
| No Radiotherapy   | 1517 | 1083 | 783 | 531 | 317 | 130 |
| NeoAdjuvant Group | 1519 | 1122 | 773 | 500 | 300 | 136 |

D2 Tumor Size(<= 5cm)

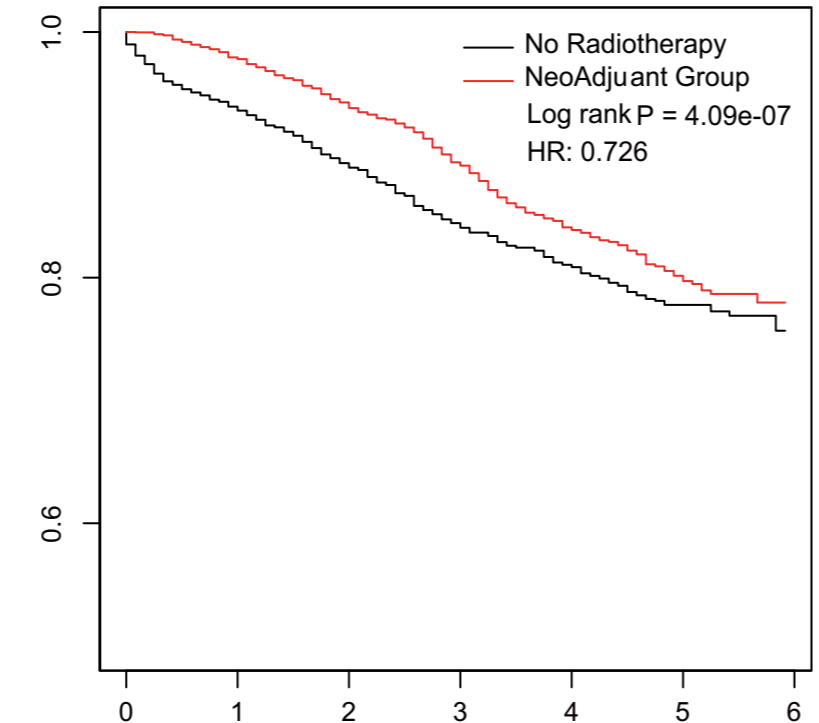

|                   |      |      |      |      |     |     |
|-------------------|------|------|------|------|-----|-----|
| No. at risk       |      |      |      |      |     |     |
| No Radiotherapy   | 3467 | 2585 | 1940 | 1336 | 838 | 380 |
| NeoAdjuvant Group | 3465 | 2715 | 2031 | 1344 | 771 | 370 |

E1 Age(<= 50)

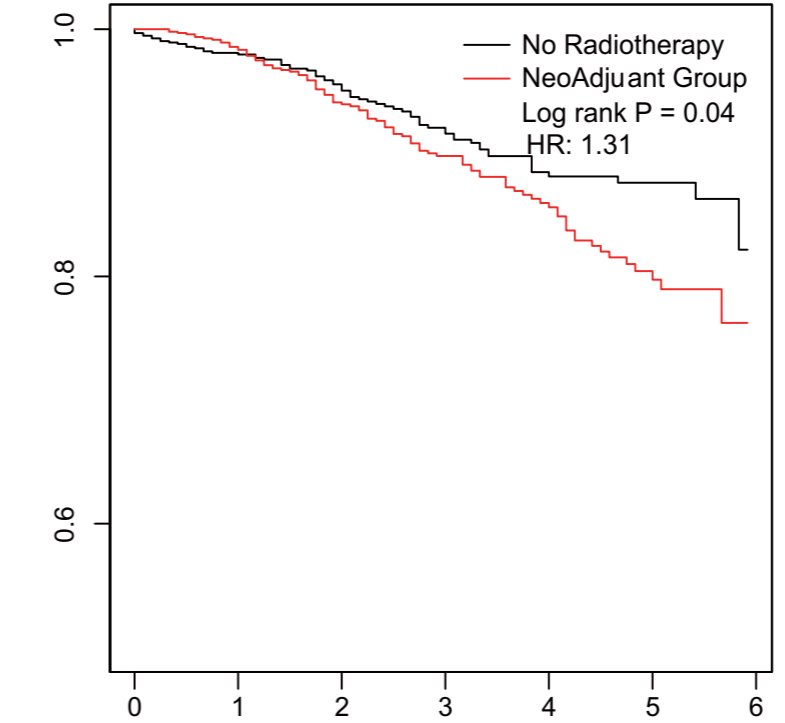

|                   |      |     |     |     |     |     |
|-------------------|------|-----|-----|-----|-----|-----|
| No. at risk       |      |     |     |     |     |     |
| No Radiotherapy   | 956  | 754 | 563 | 386 | 253 | 116 |
| NeoAdjuvant Group | 1027 | 827 | 601 | 408 | 246 | 116 |

E2 Age(> 50)

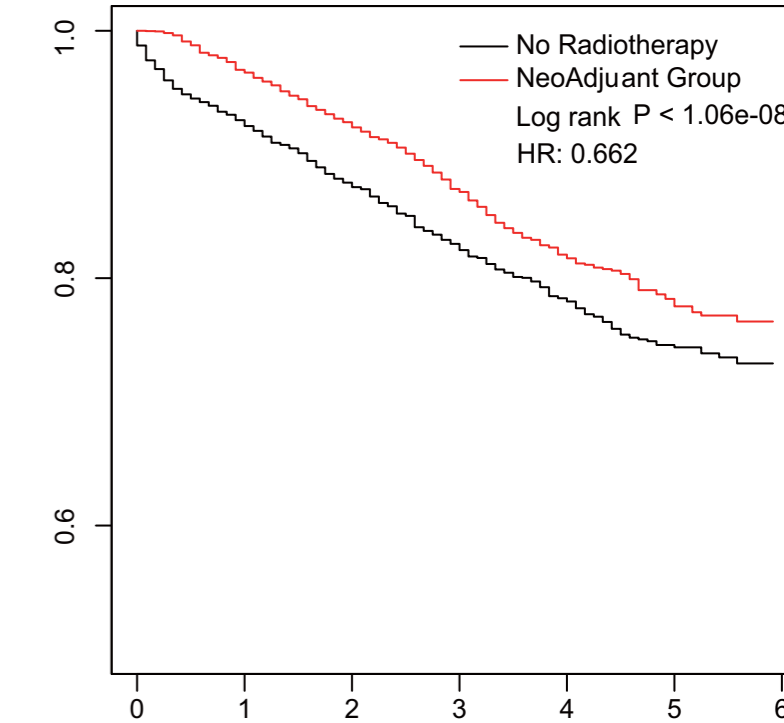

|                   |      |      |      |      |     |     |
|-------------------|------|------|------|------|-----|-----|
| No. at risk       |      |      |      |      |     |     |
| No Radiotherapy   | 4028 | 2914 | 2160 | 1481 | 902 | 394 |
| NeoAdjuvant Group | 3957 | 3010 | 2203 | 1436 | 825 | 390 |

Younger

A

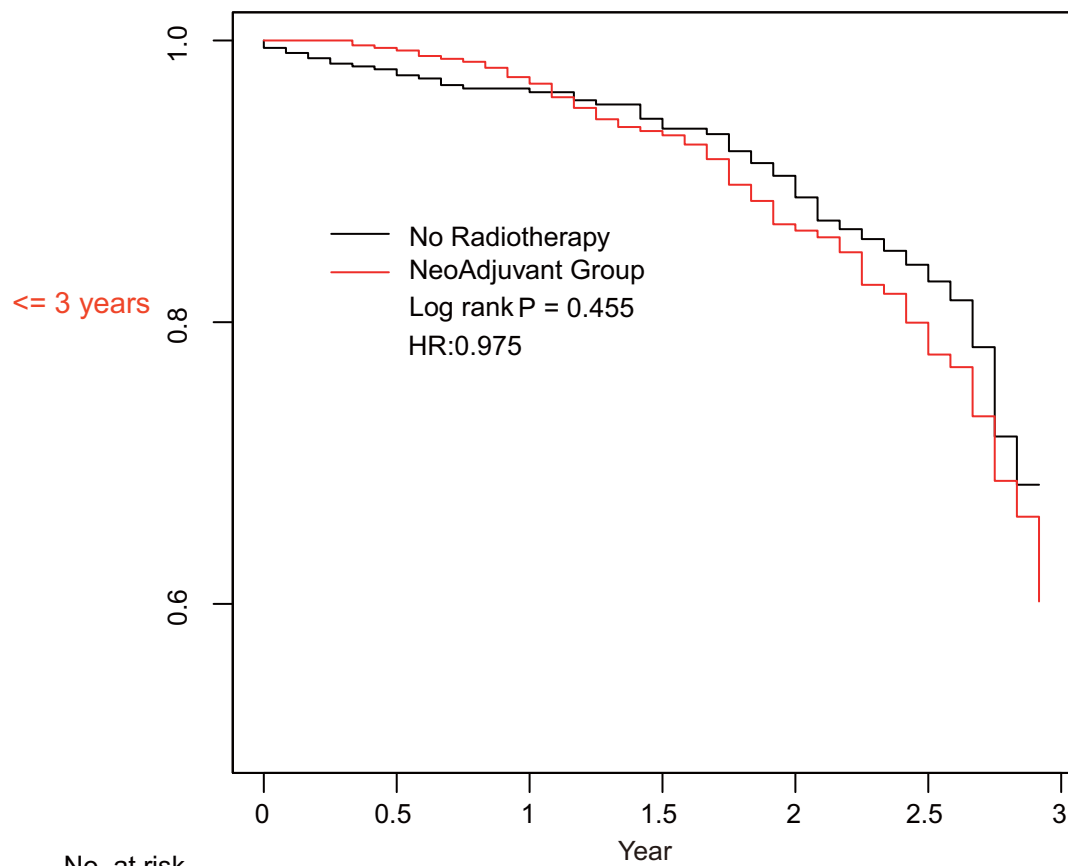

No. at risk

|                   |     |     |     |     |     |     |
|-------------------|-----|-----|-----|-----|-----|-----|
| No Radiotherapy   | 570 | 460 | 368 | 268 | 177 | 71  |
| NeoAdjuvant Group | 619 | 536 | 419 | 308 | 193 | 106 |

Older

B

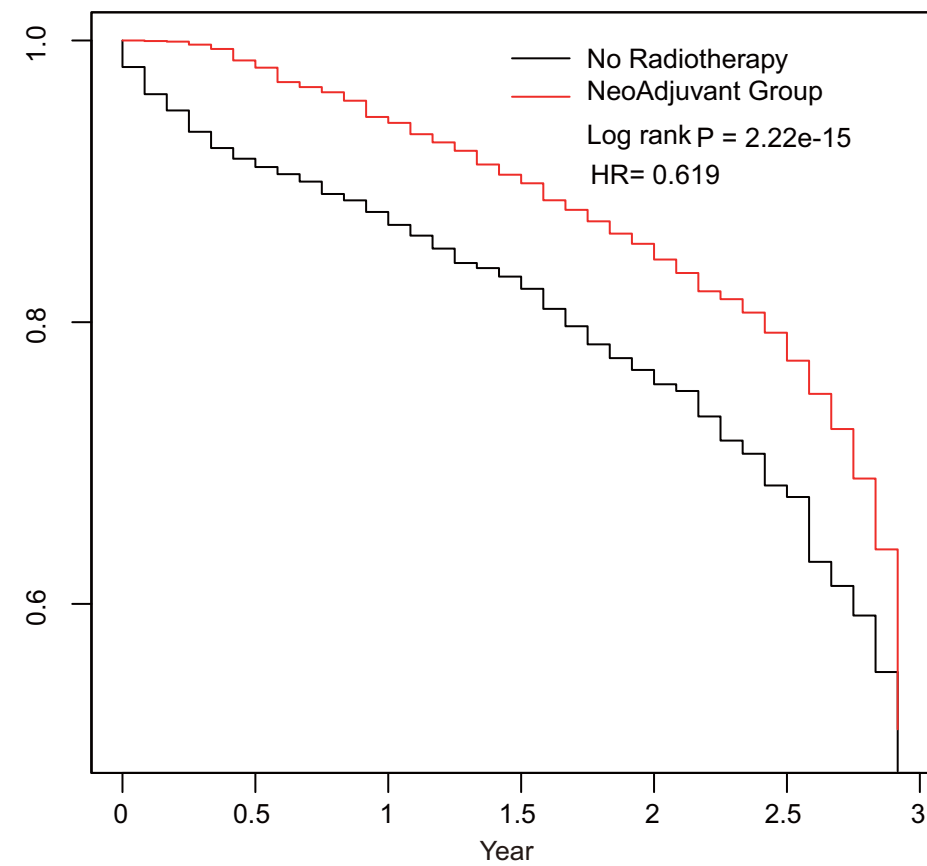

|  |      |      |      |      |     |     |
|--|------|------|------|------|-----|-----|
|  | 2547 | 1864 | 1433 | 1055 | 679 | 334 |
|  | 2521 | 2113 | 1574 | 1190 | 767 | 399 |

C

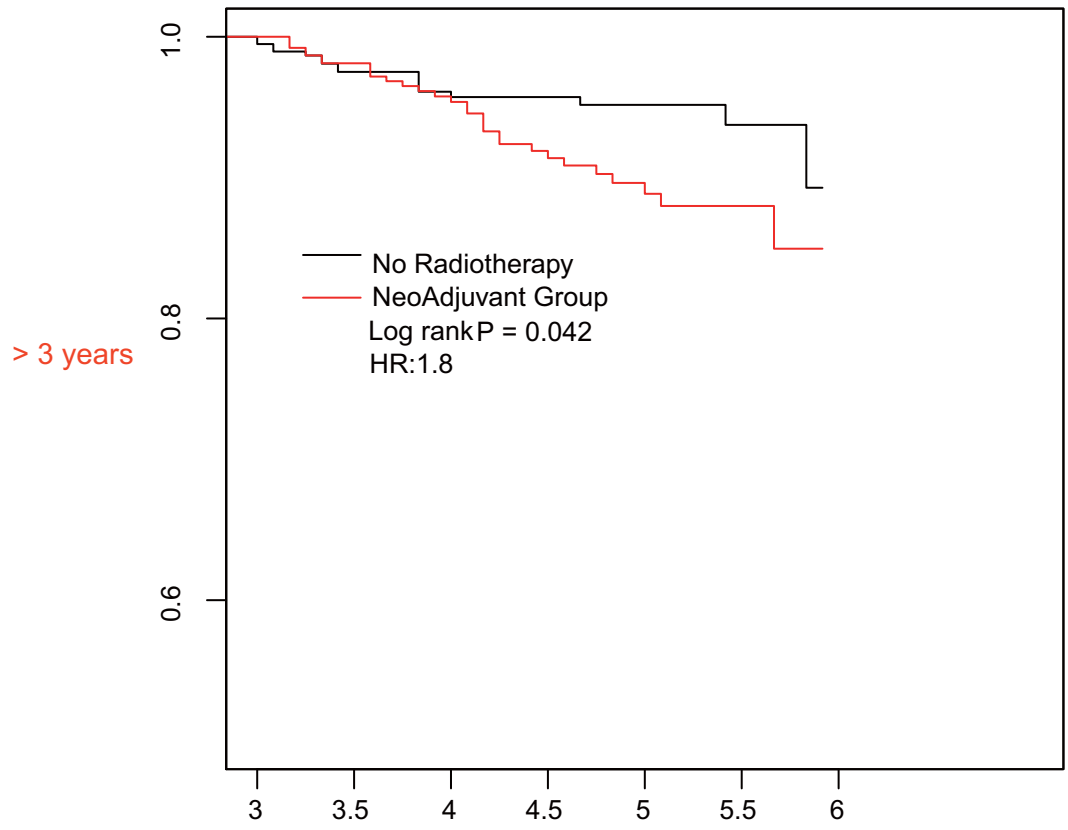

No. at risk

|                   |     |     |     |     |     |    |
|-------------------|-----|-----|-----|-----|-----|----|
| No Radiotherapy   | 386 | 320 | 253 | 195 | 116 | 60 |
| NeoAdjuvant Group | 408 | 323 | 246 | 179 | 116 | 54 |

D

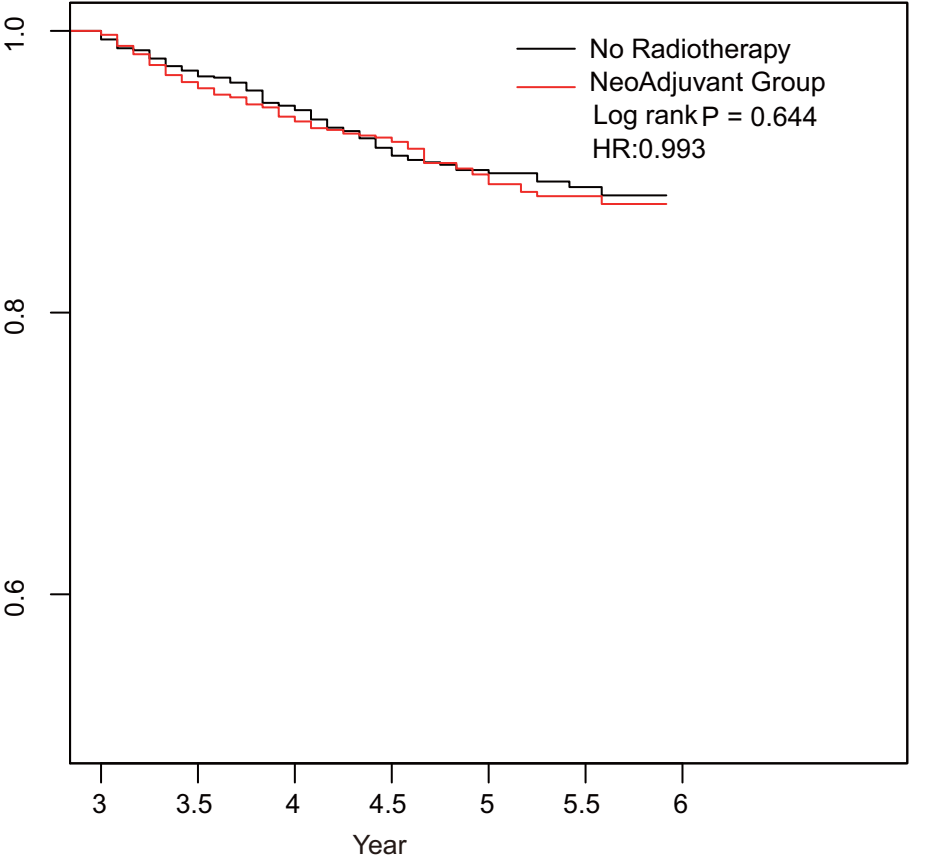

|  |      |      |     |     |     |     |
|--|------|------|-----|-----|-----|-----|
|  | 1481 | 1174 | 902 | 652 | 394 | 184 |
|  | 1436 | 1101 | 825 | 605 | 390 | 195 |
